# Supplementary material
Source: PubMed Central journal article supplement (PMC4293346)
Supplement: NIHMS640644-supplement-439_2014_1504_MOESM2_ESM.pdf [file NIHMS640644-supplement-439_2014_1504_MOESM2_ESM.pdf]

|        |            | children<br>whites |           |           |        |          |            |       |         |             |        |         |
|--------|------------|--------------------|-----------|-----------|--------|----------|------------|-------|---------|-------------|--------|---------|
|        |            | COHRA (N=608)      |           |           |        |          | IHS (N=41) |       |         | IFS (N=136) |        |         |
| gene   | SNP        | chromosome         | position  | beta      | SE     | p-value  | beta       | SE    | p-value | beta        | SE     | p-value |
| AMBN   | rs17149026 | 4                  | 71440940  | -0.2575   | 0.3198 | 0.4211   | 0.7944     | 3.98  | 0.8429  | -0.5944     | 0.5199 | 0.255   |
|        | rs17733915 | 4                  | 71447093  | 0.3792    | 0.1831 | 0.03877  | 1.531      | 1.089 | 0.1681  | -0.01916    | 0.2758 | 0.9447  |
|        | rs7439186  | 4                  | 71469604  | 0.1557    | 0.3516 | 0.6581   | NA         | NA    | NA      | 0.9038      | 0.5743 | 0.1179  |
| ENAM   | rs1967376  | 4                  | 71501744  | -0.2772   | 0.481  | 0.5646   | -0.2508    | 2.983 | 0.9334  | -0.3243     | 0.6962 | 0.6421  |
|        | rs12640848 | 4                  | 71506412  | 0.03201   | 0.1989 | 0.8722   | -1.536     | 1.318 | 0.2513  | 0.1473      | 0.2924 | 0.6152  |
| TFIP11 | rs17402286 | 22                 | 26894879  | -0.1145   | 0.4388 | 0.7942   | -2.703     | 4.138 | 0.5176  | 0.8311      | 0.5863 | 0.1587  |
|        | rs6005060  | 22                 | 26895736  | -0.7235   | 0.3152 | 0.02204  | 1.745      | 2.493 | 0.4884  | -0.3488     | 0.4324 | 0.4213  |
|        | rs713900   | 22                 | 26898242  | 0.2828    | 0.3235 | 0.3823   | -2.505     | 2.591 | 0.3399  | -0.4605     | 0.6775 | 0.4979  |
|        | rs134134   | 22                 | 26898891  | 0.7205    | 0.2728 | 0.008467 | -1.143     | 1.74  | 0.5155  | 0.01542     | 0.4826 | 0.9746  |
|        | rs134135   | 22                 | 26898962  | 0.7549    | 0.2572 | 0.003    | -0.3296    | 1.85  | 0.8596  | -0.05748    | 0.4569 | 0.9001  |
|        | rs2097470  | 22                 | 26904965  | -0.01612  | 0.2643 | 0.9514   | 0.9028     | 1.799 | 0.6187  | -0.2738     | 0.4658 | 0.5577  |
|        | rs134145   | 22                 | 26909750  | -0.4084   | 0.1856 | 0.02817  | 0.4312     | 1.256 | 0.7333  | -0.3864     | 0.2816 | 0.1723  |
| TUFT1  | rs2337359  | 1                  | 151495796 | -0.2623   | 0.2496 | 0.2936   | 0.5034     | 1.709 | 0.77    | 0.2465      | 0.3613 | 0.4963  |
|        | rs1045298  | 1                  | 151510825 | -0.07064  | 0.2633 | 0.7885   | -1.283     | 1.774 | 0.4741  | 0.5529      | 0.4247 | 0.1952  |
|        | rs10158855 | 1                  | 151515654 | 0.0002306 | 0.1805 | 0.999    | 0.9176     | 1.334 | 0.4957  | -0.2914     | 0.292  | 0.3202  |
|        | rs17640579 | 1                  | 151521933 | 0.09479   | 0.205  | 0.644    | 0.02316    | 1.625 | 0.9887  | 0.195       | 0.3094 | 0.5296  |
|        | rs16833391 | 1                  | 151547253 | -0.003429 | 0.3197 | 0.9914   | 1.476      | 2.322 | 0.529   | -0.1521     | 0.493  | 0.7581  |
|        | rs12749    | 1                  | 151555741 | -0.2763   | 0.2391 | 0.2484   | -2.215     | 1.887 | 0.248   | -0.1394     | 0.422  | 0.7417  |

| gene   | SNP        | blacks       |              |        | IHS (N=23) |         |       | all children |         | adults whites |        |         |
|--------|------------|--------------|--------------|--------|------------|---------|-------|--------------|---------|---------------|--------|---------|
|        |            | Meta (N=785) | COHRA (N=81) |        |            |         |       | Meta (N=889) |         | COHRA (N=994) |        |         |
|        |            | p-value      | beta         | SE     | p-value    | beta    | SE    | p-value      | p-value | beta          | SE     | p-value |
| AMBN   | rs17149026 | 0.2557       | -1.105       | 0.5134 | 0.03458    | 2.37    | 2.142 | 0.284        | 0.1251  | -0.2639       | 0.5207 | 0.6124  |
|        | rs17733915 | 0.0354       | 0.7376       | 0.4929 | 0.1388     | -1.836  | 2.731 | 0.5104       | 0.02044 | 0.1407        | 0.2915 | 0.6294  |
|        | rs7439186  | 0.2849       | 0.5933       | 0.5125 | 0.2507     | -0.7093 | 2.334 | 0.7649       | 0.191   | 0.02106       | 0.579  | 0.971   |
| ENAM   | rs1967376  | 0.4717       | -0.1703      | 0.4321 | 0.6945     | 0.5522  | 1.482 | 0.7141       | 0.4618  | 0.6368        | 0.7114 | 0.371   |
|        | rs12640848 | 0.9295       | -0.4748      | 0.5699 | 0.4074     | -12.77  | 5.309 | 0.02783      | 0.6018  | -0.3537       | 0.3106 | 0.2551  |
| TFIP11 | rs17402286 | 0.8338       | 3.052        | 1.213  | 0.01405    | -2.163  | 5.33  | 0.69         | 0.3815  | -0.03027      | 0.7207 | 0.9665  |
|        | rs6005060  | 0.02842      | -0.6081      | 0.4349 | 0.1661     | -1.544  | 2.482 | 0.5421       | 0.01001 | -0.1716       | 0.5094 | 0.7363  |
|        | rs713900   | 0.7896       | 0.714        | 1.127  | 0.5283     | NA      | NA    | NA           | 0.6547  | 0.2158        | 0.5441 | 0.6917  |
|        | rs134134   | 0.02913      | -0.06444     | 0.4155 | 0.8772     | 0.6345  | 1.726 | 0.7176       | 0.03924 | 0.1334        | 0.4514 | 0.7676  |
|        | rs134135   | 0.01308      | 0.03342      | 0.3895 | 0.9319     | -0.1206 | 1.651 | 0.9426       | 0.019   | 0.2136        | 0.4049 | 0.5979  |
|        | rs2097470  | 0.8539       | 1.14         | 0.975  | 0.2461     | -6.263  | 5.212 | 0.246        | 0.9887  | -0.4447       | 0.4372 | 0.3093  |
|        | rs134145   | 0.01545      | -0.0331      | 0.3804 | 0.9309     | -0.8127 | 1.659 | 0.6306       | 0.01737 | -0.07848      | 0.3009 | 0.7943  |
|        | rs2337359  | 0.1392       | 0.04209      | 0.4189 | 0.9202     | -1.082  | 3.081 | 0.7299       | 0.2026  | -0.1572       | 0.4027 | 0.6964  |
| TUFT1  | rs1045298  | 0.2279       | 1.353        | 1.516  | 0.3749     | -9.557  | 5.809 | 0.1183       | 0.3478  | 0.06459       | 0.3935 | 0.8697  |
|        | rs10158855 | 0.7971       | 0.307        | 0.4081 | 0.4542     | -1.44   | 1.931 | 0.4662       | 0.8943  | 0.1188        | 0.2946 | 0.6869  |
|        | rs17640579 | 0.5021       | 0.6475       | 0.6885 | 0.35       | -1.495  | 3.487 | 0.6739       | 0.3969  | 0.01757       | 0.3378 | 0.9585  |
|        | rs16833391 | 0.995        | 0.1503       | 0.5984 | 0.8023     | 2.78    | 2.939 | 0.3575       | 0.8185  | -0.0101       | 0.4591 | 0.9825  |
|        | rs12749    | 0.1564       | 0.02552      | 0.4101 | 0.9505     | -2.884  | 1.622 | 0.09329      | 0.1134  | 0.2667        | 0.3688 | 0.4697  |

|        |            | Dental SCORE (N=277) |        |         | DRDR (N=702) |        |         | CEDAR (N=173) |        |         | Meta (N=2,146) |
|--------|------------|----------------------|--------|---------|--------------|--------|---------|---------------|--------|---------|----------------|
| gene   | SNP        | beta                 | SE     | p-value | beta         | SE     | p-value | beta          | SE     | p-value | p-value        |
| AMBN   | rs17149026 | 1.346                | 0.89   | 0.1315  | -0.2631      | 0.7752 | 0.7344  | -0.3235       | 1.119  | 0.7729  | 0.9371         |
|        | rs17733915 | -0.1228              | 0.4626 | 0.7909  | -0.67        | 0.3929 | 0.08857 | -0.1934       | 0.4814 | 0.6884  | 0.3931         |
|        | rs7439186  | -0.7887              | 0.8542 | 0.3567  | -0.17        | 0.7427 | 0.8191  | 1.182         | 1.192  | 0.3229  | 0.8756         |
| ENAM   | rs1967376  | 0.5442               | 1.042  | 0.6019  | -0.5996      | 0.8686 | 0.4902  | 3.588         | 1.436  | 0.01344 | 0.2698         |
|        | rs12640848 | -0.8397              | 0.4627 | 0.07061 | -0.8115      | 0.4149 | 0.05086 | 0.66          | 0.5131 | 0.2001  | 0.02948        |
| TFIP11 | rs17402286 | 0.168                | 1.229  | 0.8914  | -0.01529     | 1.006  | 0.9879  | -0.8841       | 1.196  | 0.4609  | 0.8434         |
|        | rs6005060  | 0.1846               | 0.763  | 0.809   | 0.1369       | 0.687  | 0.842   | -0.2524       | 0.8649 | 0.7708  | 0.9116         |
|        | rs713900   | -1.038               | 0.8875 | 0.2434  | -1.223       | 0.8702 | 0.1602  | 0.1945        | 1.153  | 0.8663  | 0.3654         |
|        | rs134134   | -0.6246              | 0.726  | 0.3903  | 0.4272       | 0.7168 | 0.5514  | 0.1036        | 0.8036 | 0.8976  | 0.7875         |
|        | rs134135   | -0.7697              | 0.6634 | 0.2469  | -0.4313      | 0.6486 | 0.5063  | -0.3524       | 0.8015 | 0.6607  | 0.5743         |
|        | rs2097470  | 0.2652               | 0.6578 | 0.6871  | 0.4208       | 0.578  | 0.4668  | 1.722         | 0.6799 | 0.01225 | 0.5642         |
|        | rs134145   | 0.1328               | 0.4507 | 0.7685  | -0.3867      | 0.418  | 0.3552  | 0.4329        | 0.5078 | 0.3951  | 0.7207         |
| TUFT1  | rs2337359  | -0.4823              | 0.5524 | 0.3833  | 0.7187       | 0.5223 | 0.1693  | 2.126         | 0.6789 | 0.00205 | 0.0251         |
|        | rs1045298  | 0.4418               | 0.6005 | 0.4626  | -0.2548      | 0.5401 | 0.6373  | -0.5268       | 0.7174 | 0.4638  | 0.3935         |
|        | rs10158855 | 0.04054              | 0.451  | 0.9284  | 0.8299       | 0.3963 | 0.0366  | -0.3023       | 0.4997 | 0.546   | 0.1833         |
|        | rs17640579 | 0.59                 | 0.5346 | 0.2708  | -0.3696      | 0.4498 | 0.4116  | 0.01667       | 0.5237 | 0.9746  | 0.9772         |
|        | rs16833391 | 0.2909               | 0.8206 | 0.7233  | -0.2636      | 0.7843 | 0.737   | 0.6255        | 0.9546 | 0.5131  | 0.9157         |
|        | rs12749    | 0.4469               | 0.6292 | 0.4782  | 0.1425       | 0.5192 | 0.7837  | -0.2265       | 0.6595 | 0.7317  | 0.42           |

|        |            | blacks       |       |         |                      |        |         |              |        |         |              |        |
|--------|------------|--------------|-------|---------|----------------------|--------|---------|--------------|--------|---------|--------------|--------|
|        |            | COHRA (N=86) |       |         | Dental SCORE (N=225) |        |         | DRDR (N=173) |        |         | CEDAR (N=68) |        |
| gene   | SNP        | beta         | SE    | p-value | beta                 | SE     | p-value | beta         | SE     | p-value | beta         | SE     |
| AMBN   | rs17149026 | -0.1213      | 1.287 | 0.9252  | -0.3748              | 0.6728 | 0.5781  | 0.5683       | 1.003  | 0.5718  | -0.1276      | 0.9733 |
|        | rs17733915 | -0.1218      | 1.246 | 0.9223  | -0.03969             | 0.6025 | 0.9475  | -0.3394      | 0.8545 | 0.6918  | 0.3678       | 0.9164 |
|        | rs7439186  | -0.4931      | 1.23  | 0.6897  | -0.2626              | 0.7068 | 0.7106  | 0.6878       | 1.149  | 0.5502  | 1.051        | 1.091  |
| ENAM   | rs1967376  | 0.01998      | 1.073 | 0.9852  | -0.4254              | 0.5101 | 0.4052  | 0.4444       | 0.7263 | 0.5414  | 1.112        | 0.7634 |
|        | rs12640848 | -0.4908      | 1.297 | 0.7062  | 0.4459               | 0.6959 | 0.5223  | -0.4705      | 1.099  | 0.669   | 1.374        | 1.259  |
| TFIP11 | rs17402286 | -2.793       | 3.755 | 0.4592  | -4.572               | 2.754  | 0.09826 | 0.2702       | 3.119  | 0.9311  | 1.04         | 4.321  |
|        | rs6005060  | -0.9236      | 1.524 | 0.5462  | -1.12                | 0.7476 | 0.1357  | -0.1171      | 0.9661 | 0.9037  | -0.7022      | 0.9542 |
|        | rs713900   | 4.478        | 3.697 | 0.2294  | 0.984                | 1.626  | 0.5458  | -2.909       | 3.228  | 0.3688  | 0.4523       | 4.471  |
|        | rs134134   | -0.01515     | 1.135 | 0.9894  | 0.2372               | 0.5367 | 0.659   | -0.431       | 0.8619 | 0.6177  | -1.217       | 0.9216 |
|        | rs134135   | -0.5615      | 1.034 | 0.5885  | 0.5078               | 0.5328 | 0.3416  | -0.5073      | 0.8085 | 0.5312  | -0.05391     | 0.8066 |
|        | rs2097470  | -1.208       | 2.295 | 0.6003  | -0.04539             | 1.277  | 0.9717  | -2.267       | 2.125  | 0.2877  | -0.6754      | 2.095  |
|        | rs134145   | -0.138       | 1.209 | 0.9094  | -1.338               | 0.5848 | 0.02305 | -0.2611      | 0.7517 | 0.7288  | -0.2288      | 0.8767 |
|        | rs2337359  | -0.147       | 0.958 | 0.8784  | 0.8818               | 0.5104 | 0.08546 | 0.855        | 0.7238 | 0.2392  | -0.7691      | 0.8053 |
| TUFT1  | rs1045298  | -2.301       | 3.24  | 0.4798  | 0.1038               | 1.406  | 0.9412  | 0.4091       | 2.009  | 0.8389  | -3.374       | 2.243  |
|        | rs10158855 | 0.4046       | 1.021 | 0.6931  | -0.4502              | 0.518  | 0.3857  | 0.791        | 0.7524 | 0.2947  | 0.6085       | 0.8418 |
|        | rs17640579 | -5.091       | 2.302 | 0.02982 | 0.2599               | 0.8352 | 0.756   | 0.1394       | 1.245  | 0.911   | 0.3638       | 1.483  |
|        | rs16833391 | -0.7912      | 1.271 | 0.5354  | -0.5567              | 0.755  | 0.4617  | 0.4528       | 1.09   | 0.6783  | -0.04215     | 1.072  |
|        | rs12749    | -0.8506      | 1.056 | 0.4232  | -0.08519             | 0.5808 | 0.8835  | -0.5297      | 0.7737 | 0.4945  | 0.9539       | 0.8365 |

|        |            | all adults   |                |         |
|--------|------------|--------------|----------------|---------|
|        |            | Meta (N=552) | Meta (N=2,698) |         |
| gene   | SNP        | p-value      | p-value        | p-value |
| AMBN   | rs17149026 | 0.8961       | 0.9033         | 0.9003  |
|        | rs17733915 | 0.6896       | 0.8714         | 0.4037  |
|        | rs7439186  | 0.3389       | 0.7828         | 0.9881  |
| ENAM   | rs1967376  | 0.1503       | 0.7469         | 0.2584  |
|        | rs12640848 | 0.2792       | 0.6874         | 0.07837 |
| TFIP11 | rs17402286 | 0.8106       | 0.2243         | 0.4679  |
|        | rs6005060  | 0.4646       | 0.1297         | 0.4328  |
|        | rs713900   | 0.9198       | 0.6952         | 0.5287  |
|        | rs134134   | 0.1914       | 0.6445         | 0.9748  |
|        | rs134135   | 0.9469       | 0.9854         | 0.6222  |
|        | rs2097470  | 0.7483       | 0.3482         | 0.9294  |
|        | rs134145   | 0.7949       | 0.07471        | 0.2605  |
|        | rs2337359  | 0.3433       | 0.0317         | 0.0029  |
| TUFT1  | rs1045298  | 0.1376       | 0.3365         | 0.2322  |
|        | rs10158855 | 0.4725       | 0.6594         | 0.1657  |
|        | rs17640579 | 0.807        | 0.6095         | 0.7975  |
|        | rs16833391 | 0.9688       | 0.6198         | 0.8966  |
|        | rs12749    | 0.2585       | 0.6924         | 0.589   |
