# Supplementary material
Source: PubMed Central journal article supplement (PMC4293346)
Supplement: NIHMS640644-supplement-439_2014_1504_MOESM3_ESM.pdf [file NIHMS640644-supplement-439_2014_1504_MOESM3_ESM.pdf]

Pairwise linkage disequilibrium ( $R^2$ ) among SNPs in COHRA1 adult whites

|        | AMB       | ENAM      |           |           |           |           | TFIP11    |          |          |          |           | TUFT1    |           |           |           |           |           |          |
|--------|-----------|-----------|-----------|-----------|-----------|-----------|-----------|----------|----------|----------|-----------|----------|-----------|-----------|-----------|-----------|-----------|----------|
|        | rs1714902 | rs1773391 | rs7439186 | rs1967376 | rs1264084 | rs1740228 | rs6005060 | rs713900 | rs134134 | rs134135 | rs2097470 | rs134145 | rs2337359 | rs1045298 | rs1015885 | rs1764057 | rs1683339 | rs127491 |
| AMB    | rs1714902 | 1.00      | 0.27      | 0.04      | 0.02      | 0.01      | 0.03      | 0.00     | 0.00     | 0.00     | 0.00      | 0.00     | 0.00      | 0.00      | 0.00      | 0.00      | 0.00      | 0.00     |
|        | rs1773391 | 0.27      | 1.00      | 0.13      | 0.07      | 0.02      | 0.02      | 0.00     | 0.00     | 0.00     | 0.00      | 0.00     | 0.00      | 0.00      | 0.00      | 0.00      | 0.00      | 0.00     |
|        | rs7439186 | 0.04      | 0.13      | 1.00      | 0.24      | 0.01      | 0.00      | 0.00     | 0.00     | 0.00     | 0.00      | 0.00     | 0.00      | 0.00      | 0.01      | 0.01      | 0.01      | 0.00     |
| ENAM   | rs1967376 | 0.02      | 0.07      | 0.24      | 1.00      | 0.01      | 0.00      | 0.00     | 0.00     | 0.01     | 0.00      | 0.00     | 0.00      | 0.01      | 0.01      | 0.01      | 0.00      | 0.00     |
|        | rs1264084 | 0.01      | 0.02      | 0.01      | 0.01      | 1.00      | 0.53      | 0.00     | 0.00     | 0.00     | 0.00      | 0.00     | 0.00      | 0.00      | 0.00      | 0.00      | 0.00      | 0.00     |
|        | rs1740228 | 0.03      | 0.02      | 0.00      | 0.00      | 0.53      | 1.00      | 0.00     | 0.00     | 0.00     | 0.00      | 0.00     | 0.00      | 0.00      | 0.00      | 0.00      | 0.00      | 0.00     |
|        | rs6005060 | 0.00      | 0.00      | 0.00      | 0.00      | 0.00      | 0.00      | 1.00     | 0.09     | 0.00     | 0.00      | 0.00     | 0.00      | 0.00      | 0.00      | 0.00      | 0.00      | 0.00     |
|        | rs713900  | 0.00      | 0.00      | 0.00      | 0.00      | 0.00      | 0.00      | 0.09     | 1.00     | 0.05     | 0.00      | 0.00     | 0.00      | 0.00      | 0.00      | 0.00      | 0.00      | 0.00     |
| TFIP11 | rs134134  | 0.00      | 0.00      | 0.00      | 0.00      | 0.00      | 0.00      | 0.05     | 1.00     | 0.00     | 0.01      | 0.00     | 0.00      | 0.00      | 0.00      | 0.00      | 0.00      | 0.00     |
|        | rs134135  | 0.00      | 0.00      | 0.00      | 0.01      | 0.00      | 0.00      | 0.00     | 0.00     | 1.00     | 0.07      | 0.00     | 0.01      | 0.00      | 0.00      | 0.00      | 0.00      | 0.00     |
|        | rs2097470 | 0.00      | 0.00      | 0.00      | 0.00      | 0.00      | 0.00      | 0.00     | 0.01     | 0.07     | 1.00      | 0.00     | 0.00      | 0.00      | 0.00      | 0.00      | 0.00      | 0.00     |
|        | rs134145  | 0.00      | 0.00      | 0.00      | 0.00      | 0.00      | 0.00      | 0.00     | 0.00     | 0.00     | 0.00      | 1.00     | 0.01      | 0.00      | 0.01      | 0.01      | 0.00      | 0.08     |
|        | rs2337359 | 0.00      | 0.00      | 0.00      | 0.00      | 0.00      | 0.00      | 0.00     | 0.00     | 0.01     | 0.00      | 0.01     | 1.00      | 0.01      | 0.01      | 0.01      | 0.02      | 0.14     |
|        | rs1045298 | 0.00      | 0.00      | 0.00      | 0.01      | 0.00      | 0.00      | 0.00     | 0.00     | 0.00     | 0.00      | 0.00     | 0.01      | 1.00      | 0.45      | 0.54      | 0.01      | 0.06     |
| TUFT1  | rs1015885 | 0.00      | 0.00      | 0.01      | 0.01      | 0.00      | 0.00      | 0.00     | 0.00     | 0.00     | 0.00      | 0.01     | 0.01      | 0.45      | 1.00      | 0.71      | 0.01      | 0.07     |
|        | rs1764057 | 0.00      | 0.00      | 0.01      | 0.01      | 0.00      | 0.00      | 0.00     | 0.00     | 0.00     | 0.00      | 0.01     | 0.01      | 0.54      | 0.71      | 1.00      | 0.03      | 0.11     |
|        | rs1683339 | 0.00      | 0.00      | 0.00      | 0.00      | 0.00      | 0.00      | 0.00     | 0.00     | 0.00     | 0.00      | 0.00     | 0.02      | 0.01      | 0.01      | 0.03      | 1.00      | 0.23     |
|        | rs127491  | 0.00      | 0.00      | 0.00      | 0.00      | 0.00      | 0.00      | 0.00     | 0.00     | 0.00     | 0.00      | 0.08     | 0.14      | 0.06      | 0.07      | 0.11      | 0.23      | 1.00     |

Pairwise linkage disequilibrium ( $R^2$ ) among SNPs in COHRA1 adult blacks

|        | AMB       | ENAM      |           |           |           |           | TFIP11    |          |          |          |           | TUFT1    |           |           |           |           |           |          |
|--------|-----------|-----------|-----------|-----------|-----------|-----------|-----------|----------|----------|----------|-----------|----------|-----------|-----------|-----------|-----------|-----------|----------|
|        | rs1714902 | rs1773391 | rs7439186 | rs1967376 | rs1264084 | rs1740228 | rs6005060 | rs713900 | rs134134 | rs134135 | rs2097470 | rs134145 | rs2337359 | rs1045298 | rs1015885 | rs1764057 | rs1683339 | rs127491 |
| AMB    | rs1714902 | 1.00      | 0.03      | 0.00      | 0.01      | 0.00      | 0.01      | 0.00     | 0.00     | 0.00     | 0.00      | 0.00     | 0.03      | 0.07      | 0.00      | 0.00      | 0.00      | 0.00     |
|        | rs1773391 | 0.03      | 1.00      | 0.00      | 0.00      | 0.01      | 0.03      | 0.03     | 0.00     | 0.00     | 0.02      | 0.00     | 0.06      | 0.05      | 0.01      | 0.00      | 0.01      | 0.02     |
|        | rs7439186 | 0.00      | 0.00      | 1.00      | 0.08      | 0.07      | 0.00      | 0.01     | 0.00     | 0.00     | 0.00      | 0.00     | 0.01      | 0.00      | 0.00      | 0.01      | 0.00      | 0.01     |
| ENAM   | rs1967376 | 0.01      | 0.00      | 0.08      | 1.00      | 0.00      | 0.02      | 0.00     | 0.01     | 0.02     | 0.00      | 0.01     | 0.00      | 0.00      | 0.00      | 0.00      | 0.03      | 0.02     |
|        | rs1264084 | 0.00      | 0.01      | 0.07      | 0.00      | 1.00      | 0.36      | 0.14     | 0.04     | 0.01     | 0.01      | 0.02     | 0.02      | 0.01      | 0.00      | 0.00      | 0.01      | 0.04     |
|        | rs1740228 | 0.00      | 0.03      | 0.00      | 0.00      | 0.36      | 1.00      | 0.08     | 0.00     | 0.01     | 0.00      | 0.01     | 0.02      | 0.01      | 0.00      | 0.00      | 0.09      | 0.07     |
|        | rs6005060 | 0.01      | 0.03      | 0.01      | 0.02      | 0.14      | 0.08      | 1.00     | 0.06     | 0.01     | 0.02      | 0.06     | 0.00      | 0.01      | 0.00      | 0.01      | 0.02      | 0.01     |
|        | rs713900  | 0.00      | 0.00      | 0.00      | 0.00      | 0.04      | 0.00      | 0.06     | 1.00     | 0.05     | 0.00      | 0.08     | 0.02      | 0.00      | 0.02      | 0.01      | 0.00      | 0.01     |
| TFIP11 | rs134134  | 0.00      | 0.00      | 0.00      | 0.01      | 0.01      | 0.01      | 0.01     | 0.05     | 1.00     | 0.01      | 0.01     | 0.01      | 0.01      | 0.00      | 0.00      | 0.00      | 0.01     |
|        | rs134135  | 0.00      | 0.00      | 0.00      | 0.02      | 0.01      | 0.00      | 0.02     | 0.00     | 0.01     | 1.00      | 0.12     | 0.01      | 0.00      | 0.00      | 0.00      | 0.00      | 0.01     |
|        | rs2097470 | 0.00      | 0.02      | 0.00      | 0.00      | 0.02      | 0.01      | 0.06     | 0.08     | 0.01     | 0.12      | 1.00     | 0.01      | 0.01      | 0.01      | 0.00      | 0.00      | 0.01     |
|        | rs134145  | 0.00      | 0.00      | 0.00      | 0.01      | 0.00      | 0.01      | 0.00     | 0.02     | 0.01     | 0.01      | 0.01     | 1.00      | 0.01      | 0.00      | 0.01      | 0.00      | 0.01     |
|        | rs2337359 | 0.03      | 0.06      | 0.01      | 0.00      | 0.02      | 0.02      | 0.00     | 0.00     | 0.01     | 0.00      | 0.01     | 1.00      | 0.00      | 0.03      | 0.05      | 0.00      | 0.40     |
|        | rs1045298 | 0.07      | 0.05      | 0.00      | 0.00      | 0.01      | 0.01      | 0.01     | 0.02     | 0.01     | 0.00      | 0.01     | 0.00      | 1.00      | 0.04      | 0.03      | 0.00      | 0.01     |
| TUFT1  | rs1015885 | 0.00      | 0.01      | 0.00      | 0.00      | 0.00      | 0.00      | 0.01     | 0.00     | 0.00     | 0.01      | 0.00     | 0.03      | 0.04      | 1.00      | 0.77      | 0.04      | 0.08     |
|        | rs1764057 | 0.00      | 0.00      | 0.01      | 0.00      | 0.00      | 0.01      | 0.00     | 0.00     | 0.00     | 0.00      | 0.01     | 0.05      | 0.03      | 0.77      | 1.00      | 0.07      | 0.08     |
|        | rs1683339 | 0.00      | 0.01      | 0.00      | 0.03      | 0.01      | 0.09      | 0.02     | 0.00     | 0.00     | 0.00      | 0.00     | 0.00      | 0.04      | 0.07      | 1.00      | 1.00      | 0.13     |
|        | rs127491  | 0.00      | 0.02      | 0.01      | 0.02      | 0.04      | 0.07      | 0.01     | 0.01     | 0.01     | 0.01      | 0.01     | 0.40      | 0.01      | 0.08      | 0.08      | 0.13      | 1.00     |
